# Supplementary material for: Depletion of Bone Marrow-Derived Fibrocytes Attenuates TAA-Induced Liver Fibrosis in Mice
Source: Cells. 2019 Oct 7;8(10):1210. doi: 10.3390/cells8101210 (PMC6829877; doi:10.3390/cells8101210)
Supplement: Supplementary file 1 [file cells-08-01210-s001.pdf]

Supplementary material

# Depletion of Bone Marrow-Derived Fibrocytes Attenuates TAA-Induced Liver Fibrosis in Mice

Felix Hempel <sup>1,†</sup>, Martin Roderfeld <sup>1,†</sup>, Rajkumar Savai <sup>2,3</sup>, Akylbek Sydykov <sup>3</sup>, Karuna Irungbam <sup>1</sup>, Ralph Schermuly <sup>3</sup>, Robert Voswinckel <sup>4,5</sup>, Kernt Köhler <sup>6</sup>, Yury Churin <sup>1</sup>, Ladislau Kiss <sup>3</sup>, Jens Bier <sup>3</sup>, Jörn Pons-Kühnemann <sup>7</sup> and Elke Roeb <sup>1,\*</sup>

<sup>1</sup> Department of Gastroenterology, Justus Liebig University, D-35392 Giessen, Germany; felix.hempel@med.jlug.de (F.H.) (<https://orcid.org/0000-0002-2733-4313>); martin.roderfeld@innere.med.uni-giessen.de (M.R.); kukuirungbam@gmail.com (K.I.); yury.churin@innere.med.uni-giessen.de (Y.C.)

<sup>2</sup> Max Planck Institute for Heart and Lung Research, Member of the German Center for Lung Research (DZL), Member of the Cardio-Pulmonary Institute (CPI), D-61231 Bad Nauheim, Germany; rajkumar.savai@mpi-bn.mpg.de (<https://orcid.org/0000-0003-1538-2091>)

<sup>3</sup> Department of Internal Medicine, Cardio-Pulmonary Institute (CPI), Universities of Giessen and Marburg Lung Center (UGMLC), Member of the German Center for Lung Research (DZL), Justus Liebig University, D-35392 Giessen, Germany; akylbek.sydykov@innere.med.uni-giessen.de (A.S.) (<https://orcid.org/0000-0002-8122-7033>); ralph.schermuly@innere.med.uni-giessen.de (R.S.) (<https://orcid.org/0000-0002-5167-6970>); ladislau.kiss@innere.med.uni-giessen.de (L.K.); jens.bier@innere.med.uni-giessen.de (J.B.)

<sup>4</sup> Department of Internal Medicine, Bürgerhospital, D-61169 Friedberg, Germany; robert.voswinckel@gz-wetterau.de

<sup>5</sup> Department of Internal Medicine, Hochwaldkrankenhaus, D-61231 Bad Nauheim, Germany

<sup>6</sup> Institute of Veterinary Pathology, Justus Liebig University, D-35392 Giessen, Germany; kernt.koehler@vetmed.uni-giessen.de

<sup>7</sup> Institute of Medical Informatics, Justus Liebig University, D-35392 Giessen, Germany; joern.pons@informatik.med.uni-giessen.de (<https://orcid.org/0000-0002-8211-4399>)

<sup>†</sup> These authors contributed equally

\* Correspondence: [elke.roeb@innere.med.uni-giessen.de](mailto:elke.roeb@innere.med.uni-giessen.de); Tel.: +49-641-985-42338

## Content:

Supplementary Figure S1: Schematic plasmid construction and basic experimental data

Supplementary Table S2: Primer sequences used in quantitative real-time PCR

Supplementary Figure S3: Gene Expression Array results

Supplementary Figure S4: Hepatic protein concentrations of MMPs and TIMPs

Supplementary Figure S5: Detailed quantitative real-time PCR results

Supplementary Table S6: Grading according to Ishak *et al.*

Supplementary Figure S7: Proteome Profiling of inflammatory cytokines

Supplementary Figure S8: Hepatic protein concentrations of inflammatory cytokines

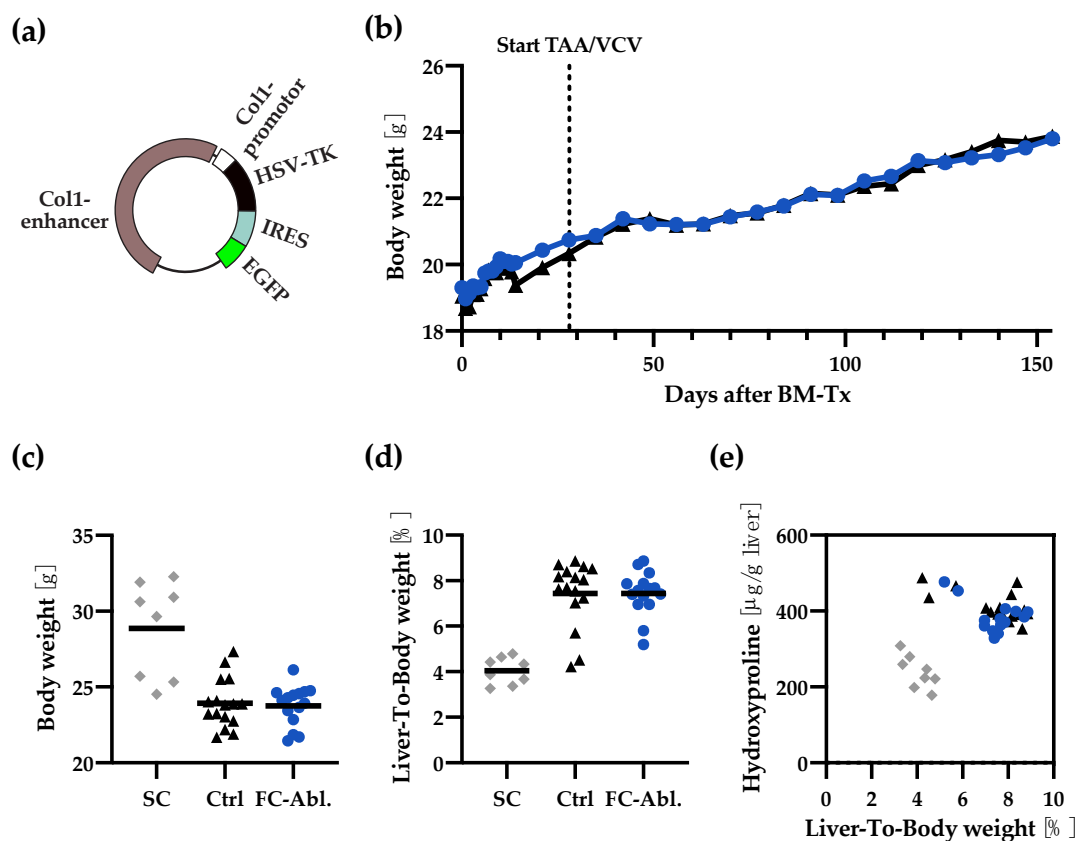

**Supplementary Figure S1: Schematic plasmid construction and basic experimental data.** (a) Schematic representation of the fusion gene construct used for the development of transgenic mice expressing HSV-TK from the type I collagen promoter [38]. Transgenic mice served as bone marrow donors for mice of the fibrocyte ablation group. (b) Body weight development of the control (n=16, black triangles) and fibrocyte-ablated group (n=15, blue dots). There was no statistically significant difference at any timepoint, indicated by a fitted mixed-effect model. (c) Final body weight. Grey diamonds depict untreated supercontrols (n=8). (d) Liver-to-body weight ratios. (e) Hydroxyproline levels plotted against liver-to-body weight ratios. The scatter plot shows that all mice, regardless of the wide scatter in liver-to-body weight, developed fibrosis, indicated by increased hepatic hydroxyproline content.

| Gene          | Primer  | Sequence (5'-3')         |
|---------------|---------|--------------------------|
| <i>Hprt</i>   | forward | GGCCTCCCATCTCCTTCATG     |
|               | reverse | CAGTCCCAGCGTCGTGATTA     |
| <i>Col1a1</i> | forward | GCTCCTCTTAGGGGCCACT      |
|               | reverse | CCACGTCTCACCATTGGGG      |
| <i>Ccl2</i>   | forward | TTAAAAACCTGGATCGGAACCAA  |
|               | reverse | GCATTAGCTTCAGATTTACGGGT  |
| <i>Ccl3</i>   | forward | TTCTCTGTACCATGACACTCTGC  |
|               | reverse | CGTGGAATCTTCCGGCTGTAG    |
| <i>Ccl4</i>   | forward | TTCTGTCTGTTTCTCTTACACCT  |
|               | reverse | CTGTCTGCCTCTTTTGGTCAG    |
| <i>Ccl12</i>  | forward | ATTTCACACTTCTATGCCTCCT   |
|               | reverse | ATCCAGTATGGTCCTGAA       |
| <i>Il1b</i>   | forward | CCAGCTTCAAATCTCACAGCAG   |
|               | reverse | CTTCTTTGGGTATTGCTTGGGATC |
| <i>Tnf</i>    | forward | CCCTCACACTCAGATCATCTT    |
|               | reverse | GCTACGACGTGGGCTACAG      |
| <i>FasI</i>   | forward | TCCGTGAGTTCACCAACCAAA    |
|               | reverse | GGGGGTTCCCTGTTAAATGGG    |
| <i>Bcl2</i>   | forward | CTTCGCAGAGATGTCCAGTC     |
|               | reverse | CATCTCCCTGTTGACGCTC      |
| <i>Bax</i>    | forward | GGCAACTTCAACTGGGG        |
|               | reverse | CCACCCTGGTCTTGGATC       |

**Supplementary Table S2: Primer sequences used in quantitative real-time PCR.** QuantiTect Primer Assays (QIAGEN, Hilden, Germany) were used to detect *Acta2*, *Tgfb*, and *Pdgfb*.

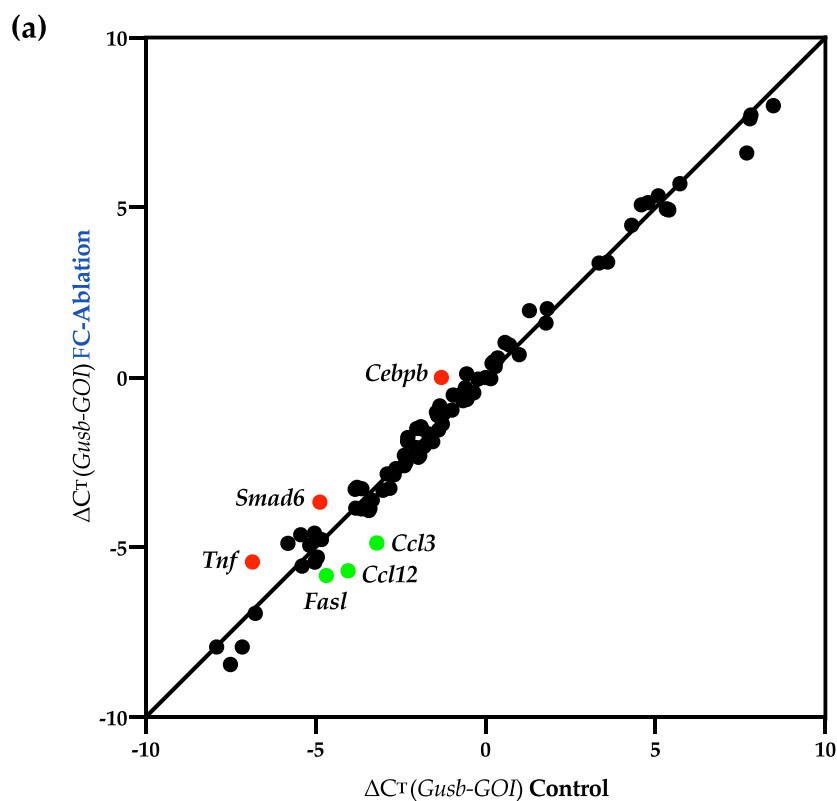

(b)

| Gene         | Fold-Regulation (FC-Abl. vs. Ctrl) |
|--------------|------------------------------------|
| <i>Cebpb</i> | 2.45                               |
| <i>Smad6</i> | 2.3                                |
| <i>Tnf</i>   | 2.7 <sup>+</sup>                   |
| <i>Ccl12</i> | -2.23 <sup>*</sup>                 |
| <i>Ccl3</i>  | -3.19                              |
| <i>Fasl</i>  | -3.12 <sup>*</sup>                 |

**Supplementary Figure S3: Gene Expression Array results.** (a) Pooled samples of the control- and fibrocyte-ablated group (n=15 per group) were analyzed. The scatter plot depicts  $\Delta C_T$  values of each of the 84 genes of interest (GOI), normalized to *Gusb*. Genes up- (red) or downregulated (green) more than two-fold are labeled. (b) Individual regulations of the six most regulated genes. Fold-regulations were obtained using the QIAGEN data analysis web portal. <sup>\*</sup>one or <sup>+</sup>both of the  $C_T$  values were >30 but <35.

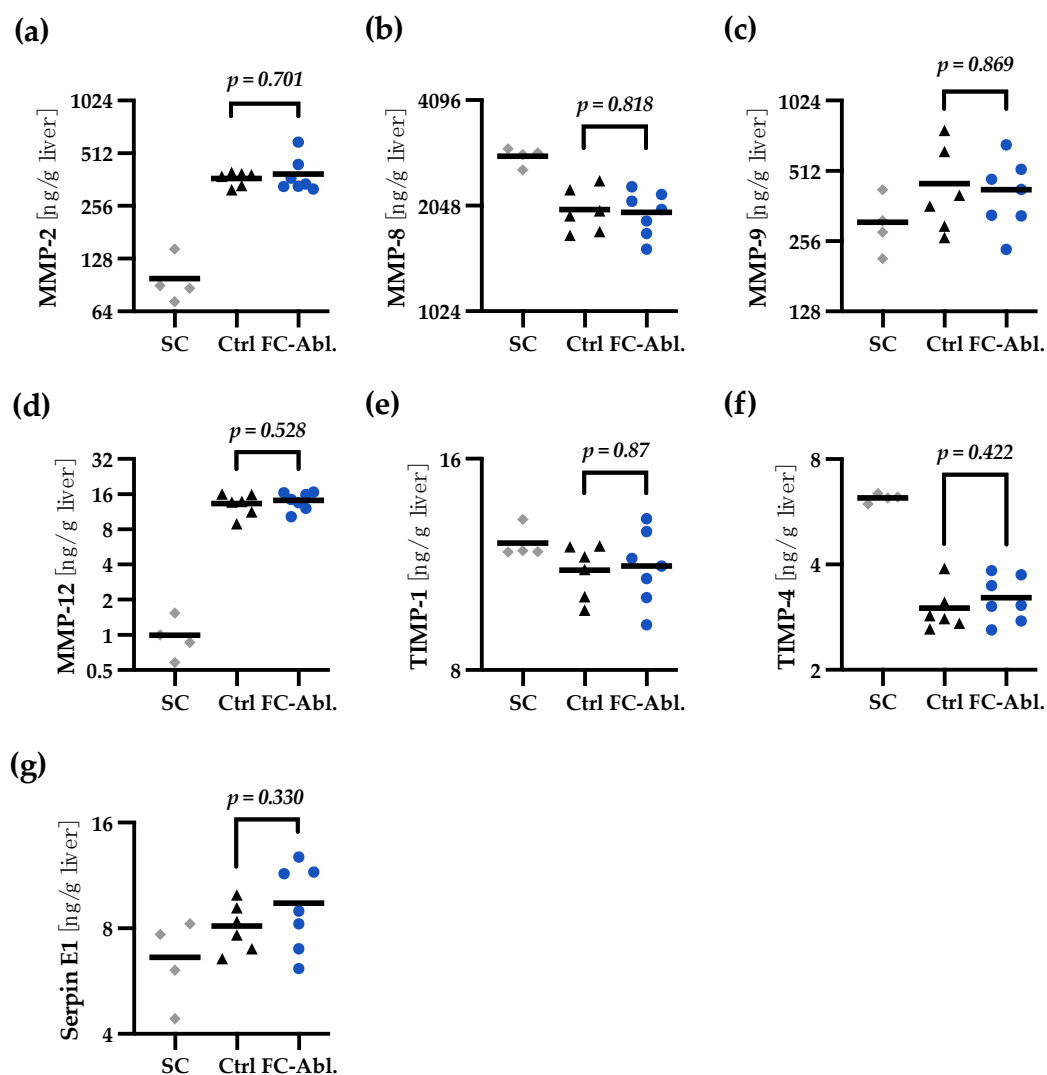

**Supplementary Figure S4: Hepatic protein concentrations of MMPs and TIMPs.** Concentration of (a) MMP-2, (b) MMP-8, (c) MMP-9, (d) MMP-12, (e) TIMP-1, (f) TIMP-4, and (g) Serpin E1/PAI-1. Measurements were performed using Magnetic Luminex Assays.  $p$ -values were calculated using unpaired t-test (two-tailed).

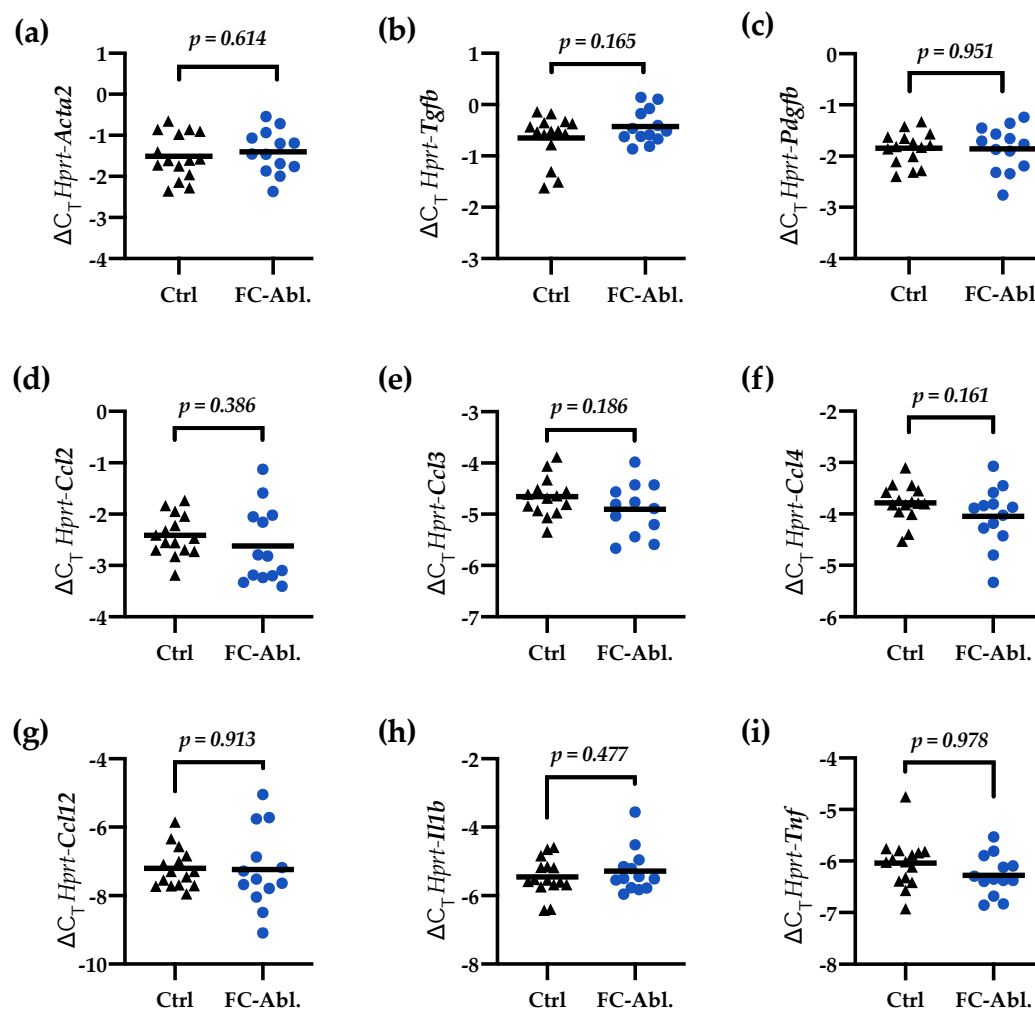

**Supplementary Figure S5: Detailed quantitative real-time PCR results.** Individual  $\Delta C_T$  values of (a) *Acta2*, (b) *Tgfb*, (c) *Pdgfb*, (d) *Ccl2*, (e) *Ccl3*, (f) *Ccl4*, (g) *Ccl12*, (h) *Il1b*, and (i) *Tnfa*, each normalized to *Hprt*. Measurements were performed twice.  $p$ -values were calculated using unpaired t-test (two-tailed).

| Category | Group               | 0         | 1         | 2        | 3         | 4        | 5        | 6        | Med.       |
|----------|---------------------|-----------|-----------|----------|-----------|----------|----------|----------|------------|
| <b>A</b> | <b>Supercontrol</b> | <b>6</b>  | <b>2</b>  | <b>0</b> | <b>0</b>  | <b>0</b> |          |          | <b>0</b>   |
|          | <b>Control</b>      | <b>0</b>  | <b>0</b>  | <b>1</b> | <b>11</b> | <b>4</b> |          |          | <b>3</b>   |
|          | <b>FC-Ablation</b>  | <b>0</b>  | <b>0</b>  | <b>0</b> | <b>8</b>  | <b>7</b> |          |          | <b>3</b>   |
| <b>B</b> | <b>Supercontrol</b> | <b>8</b>  | <b>0</b>  | <b>0</b> | <b>0</b>  | <b>0</b> | <b>0</b> | <b>0</b> | <b>0</b>   |
|          | <b>Control</b>      | <b>16</b> | <b>0</b>  | <b>0</b> | <b>0</b>  | <b>0</b> | <b>0</b> | <b>0</b> | <b>0</b>   |
|          | <b>FC-Ablation</b>  | <b>15</b> | <b>0</b>  | <b>0</b> | <b>0</b>  | <b>0</b> | <b>0</b> | <b>0</b> | <b>0</b>   |
| <b>C</b> | <b>Supercontrol</b> | <b>6</b>  | <b>2</b>  | <b>0</b> | <b>0</b>  | <b>0</b> |          |          | <b>0</b>   |
|          | <b>Control</b>      | <b>3</b>  | <b>13</b> | <b>0</b> | <b>0</b>  | <b>0</b> |          |          | <b>1</b>   |
|          | <b>FC-Ablation</b>  | <b>1</b>  | <b>14</b> | <b>0</b> | <b>0</b>  | <b>0</b> |          |          | <b>1</b>   |
| <b>D</b> | <b>Supercontrol</b> | <b>6</b>  | <b>2</b>  | <b>0</b> | <b>0</b>  | <b>0</b> |          |          | <b>0</b>   |
|          | <b>Control</b>      | <b>8</b>  | <b>8</b>  | <b>0</b> | <b>0</b>  | <b>0</b> |          |          | <b>1.5</b> |
|          | <b>FC-Ablation</b>  | <b>10</b> | <b>5</b>  | <b>0</b> | <b>0</b>  | <b>0</b> |          |          | <b>1</b>   |

**Supplementary Table S6: Grading according to Ishak *et al.*** (A) Periportal or periseptal interface hepatitis (piecemeal necrosis), (B) confluent necrosis, (C) focal (spotty) lytic necrosis, apoptosis and focal inflammation and (D) portal inflammation were rated [44]. Grading was performed by an experienced pathologist, evaluating routine hematoxylin/eosin-stained sections in a blinded fashion. Number of sections assigned to each grade and median grade of the group are given. No significant differences between control- and fibrocyte-ablated group were observed using Mann-Whitney *U* test.

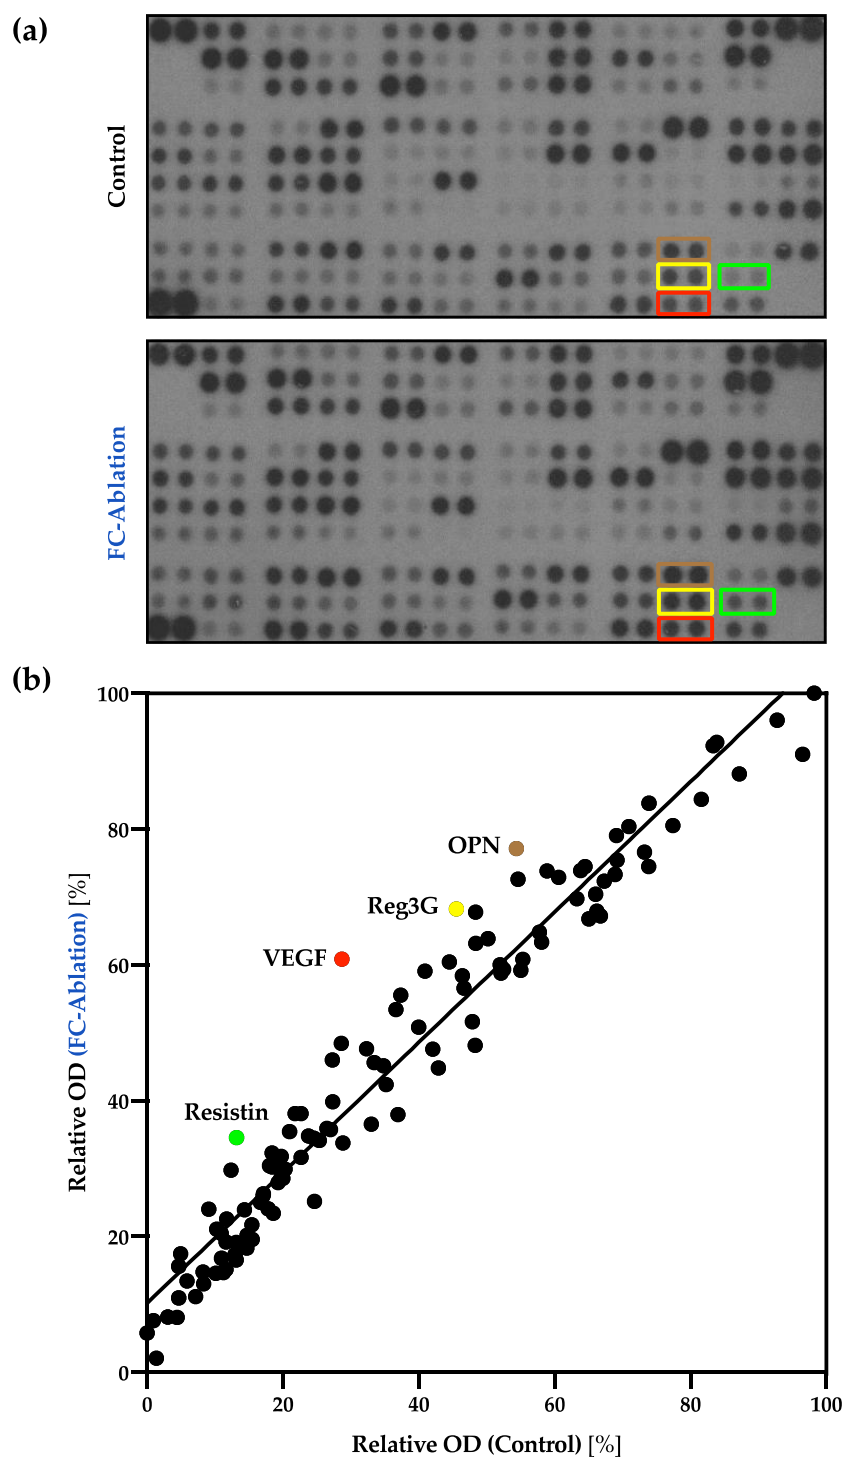

**Supplementary Figure S7: Proteome Profiling of inflammatory cytokines.** (a) High resolution scans of original arrays. (b) After background subtraction, each pair of dots was assigned a relative OD-value from 0%-100%, relative to the pair of dots with the highest OD. Relative ODs of the control and fibrocyte-ablated group are plotted. Linear regression was performed on the whole dataset ( $y=0.96x+10.15$ ), deviations from the regression curve were interpreted as regulations. The corresponding dots of the most differentially expressed proteins are labeled in (a).

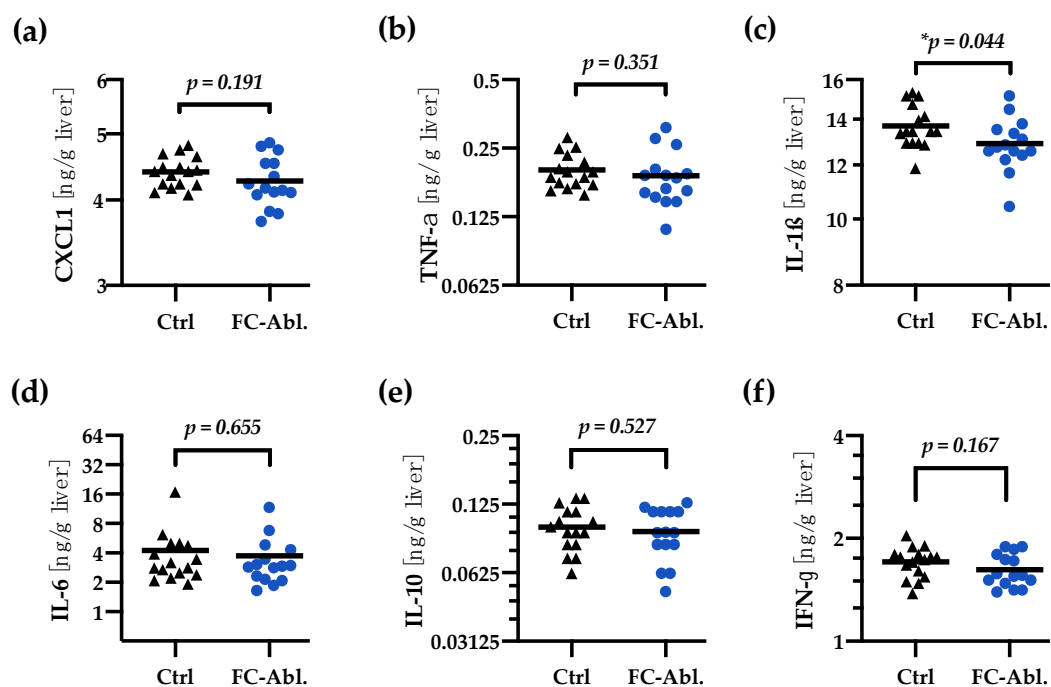

**Supplementary Figure S8: Hepatic protein concentrations of inflammatory cytokines.** Concentration of (a) CXCL1, (b) TNF- $\alpha$ , (c) IL-1 $\beta$ , (d) IL-6, (e) IL-10 and (f) IFN- $\gamma$ . Measurement was performed using Multiplex ELISAs.  $p$ -values were calculated using unpaired t-tests (two-tailed).
